# Supplementary material for: A polymer analogous reaction for the formation of imidazolium and NHC based porous polymer networks
Source: Royal Society of Chemistry journal article supplement (doi:10.1039/c2py20947k), 2013-01-01
Supplement: c2py20947k.pdf [file c2py20947k.pdf]

## Supporting Information

**Table S1:** Found and calculated C,H,N elemental composition of the networks

|               | <b>C(%)</b> | <b>H(%)</b> | <b>N(%)</b> |
|---------------|-------------|-------------|-------------|
| <b>PImin</b>  |             |             |             |
| exp           | 81.04       | 4.61        | 12.15       |
| calc          | 82.05       | 4.72        | 13.20       |
|               |             |             |             |
| <b>PImCl</b>  |             |             |             |
| exp           | 64.31       | 4.97        | 7.02        |
| calc          | 71.41       | 4.22        | 10.75       |
|               |             |             |             |
| <b>PNHC</b>   |             |             |             |
| exp           | 79.83       | 4.34        | 10.21       |
| calc          | 83.04       | 4.46        | 12.50       |
|               |             |             |             |
| <b>PCuNHC</b> |             |             |             |
| exp           | 70.31       | 3.24        | 10.65       |
| calc*         | 64.87       | 3.51        | 9.76        |

\*calculated for a completely Cu-coordinated network

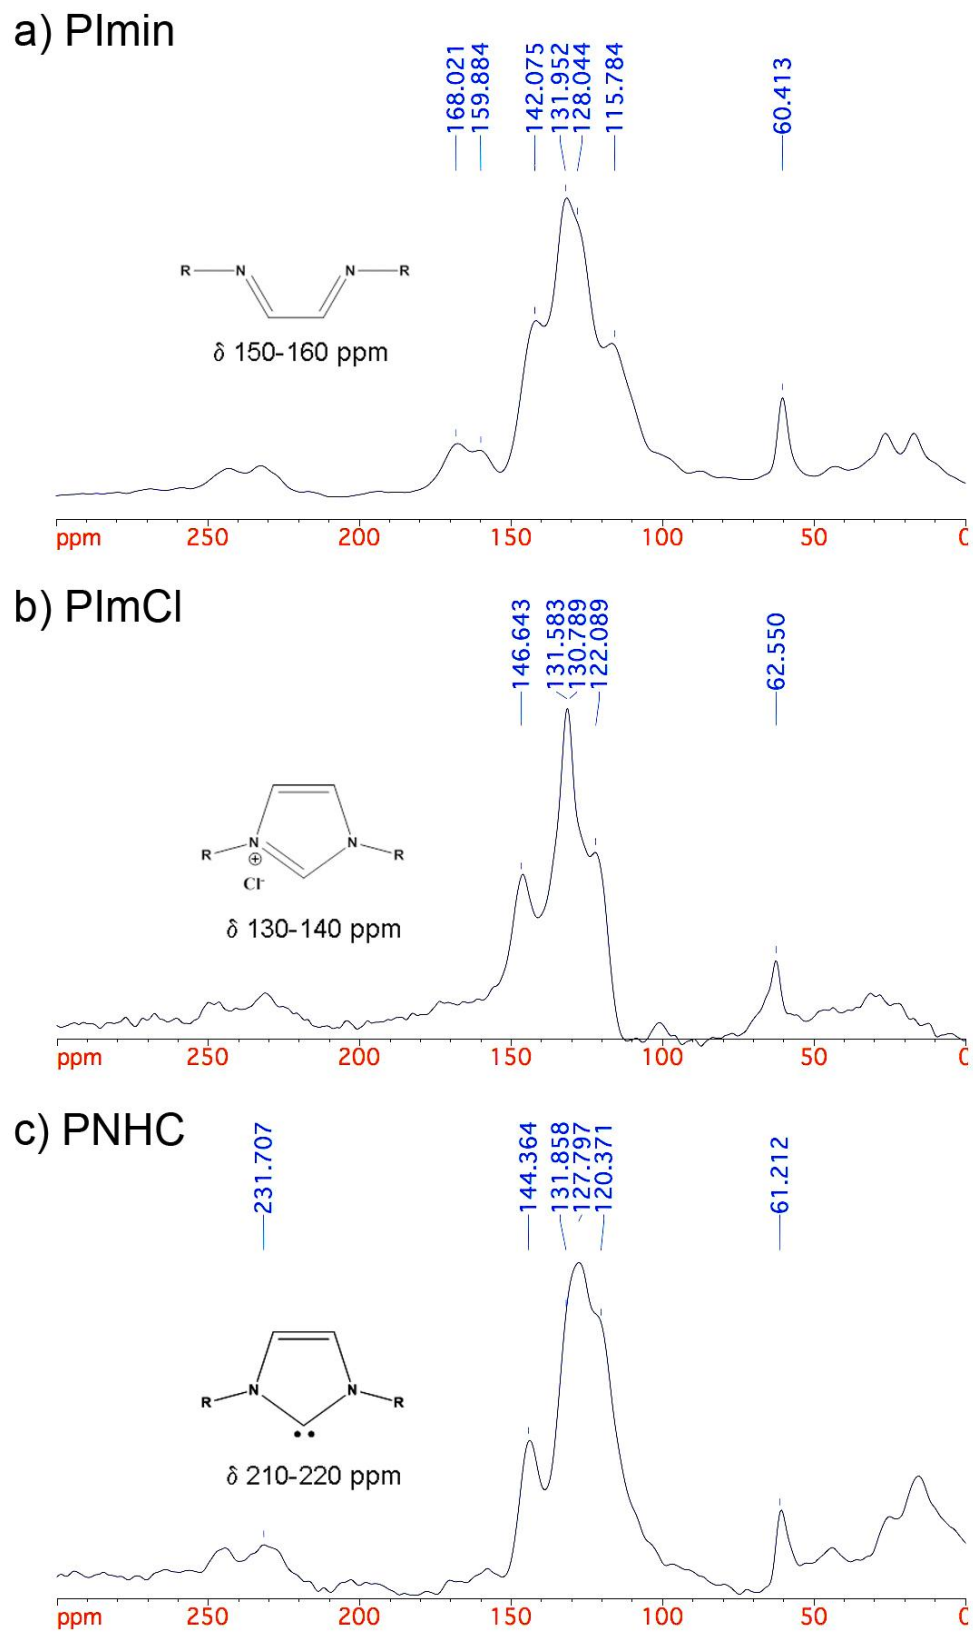

**Figure S1:**  $^{13}\text{C}$  CP-MAS NMR spectra of PImin, PImCl and PNHC with the relevant molecule units.

a) PImCl

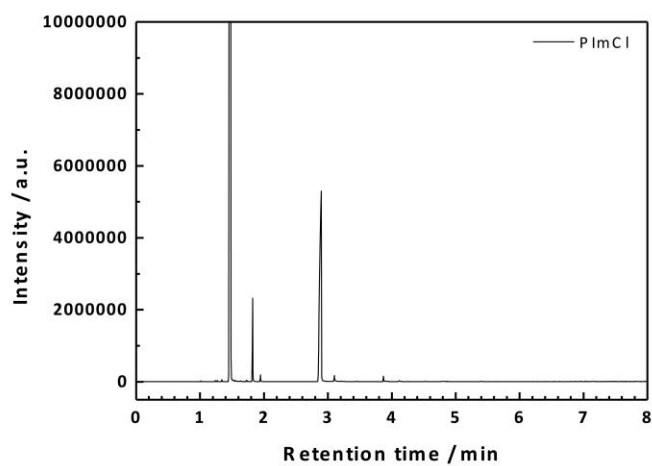

b) PNHC

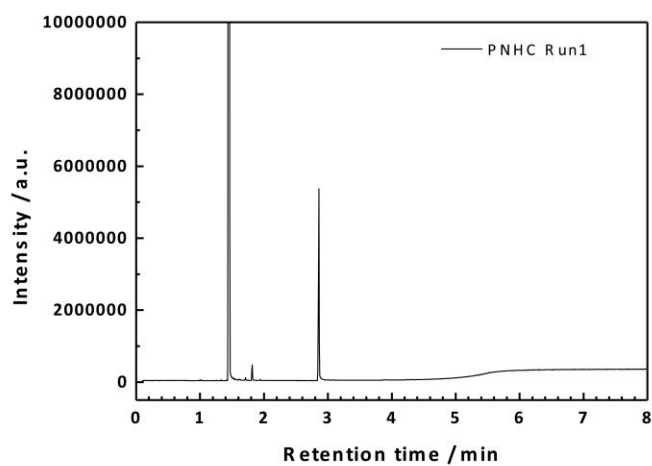

**Figure S2:** Representative GC-MS data obtained after cycloaddition of CO<sub>2</sub> over PImCl and PNHC with epichlorohydrin
